# Supplementary material
Source: PubMed Central journal article supplement (PMC2997371)
Supplement: mmc1.pdf [file mmc1.pdf]

## Supplemental Data

### A Homozygous Mutation in the Tight-Junction Protein

### JAM3 Causes Hemorrhagic Destruction of the Brain,

### Subependymal Calcification, and Congenital Cataracts

Ganeshwaran H. Mochida, Vijay S. Ganesh, Jillian M. Felie, Danielle Gleason, R. Sean Hill, Katie Rose Clapham, Daniel Rakiec, Wen-Hann Tan, Nadia Akawi, Muna Al-Saffar, Jennifer N. Partlow, Sigrid Tinschert, A. James Barkovich, Bassam Ali, Lihadh Al-Gazali, Christopher A. Walsh

**Table S1. Blocks of homozygosity over 1.0cM shared by the affected individuals tested**

| Block# | Chromosome | #Markers in the block | Block size (cM) | Block size (Mb) | Proximal boundary | Distal boundary |
|--------|------------|-----------------------|-----------------|-----------------|-------------------|-----------------|
| 1      | 11         | 1039                  | 8.5             | 3.2             | rs1627835         | rs1893054       |
| 2      | 11         | 72                    | 1.3             | 0.5             | rs2241574         | rs4937504       |
| 3      | 1          | 2                     | 1.2             | 0.8             | rs4845917         | rs2933080       |
| 4      | 14         | 2                     | 1.1             | 0.7             | rs11628672        | rs8015048       |
| 5      | 10         | 4                     | 1.0             | 1.6             | rs3802542         | rs747421        |
| 6      | 14         | 38                    | 1.0             | 0.3             | rs1677999         | rs11160674      |

**Table S2. Summary of candidate gene sequencing**

| Gene symbol    | MIM no.       | Sequencing results         |
|----------------|---------------|----------------------------|
| <i>OPCML</i>   | 600632        | No mutation found          |
| <i>SPATA19</i> | 609805        | No mutation found          |
| <i>IGSF9B</i>  | Not available | No mutation found          |
| <i>JAM3</i>    | 606871        | Splice site mutation found |
| <i>NCAPD3</i>  | 609276        | No mutation found          |
| <i>VPS26B</i>  | 610027        | No mutation found          |
| <i>THYN1</i>   | Not available | No mutation found          |
| <i>ACAD8</i>   | 604773        | No mutation found          |
| <i>GLB1L3</i>  | Not available | No mutation found          |

**Table S3. Primers used for amplification and sequencing of *JAM3* coding sequence**

| <b>Amplicon name</b> | <b>Forward primer (5'&gt;3')</b> | <b>Reverse primer (5'&gt;3')</b> | <b>Length of PCR product (bp)</b> |
|----------------------|----------------------------------|----------------------------------|-----------------------------------|
| <i>JAM3</i> Exon 1   | TTCCTTCTCCGACCTGTTGT             | GGAGCCAGGACCGCTATC               | 497                               |
| <i>JAM3</i> Exon 2   | CTCTTTCCCTTGGCTCCTTC             | GAGTTGGCTGCAAGACATCA             | 346                               |
| <i>JAM3</i> Exon 3   | CTTGGAGTGTGGAGTTGGCT             | ACTGCACTTGTTGATGCTGG             | 477                               |
| <i>JAM3</i> Exon 4   | CCAGAAACCACCCTCTTCAA             | TCAGGCAGTCTCAGCTCTCA             | 373                               |
| <i>JAM3</i> Exon 5   | TGGAGCTGATTTCTTCTGGG             | GGAAGAAGGGTCATTTTTCTG            | 443                               |
| <i>JAM3</i> Exon 6   | GGAGCTGTCAGGCAGGTATC             | TTTTCTCAGCCTTCCCTTCA             | 441                               |
| <i>JAM3</i> Exon 7   | TCTCTTCTAGCTGGGGTAGGC            | AAGGGGGAATGTTGTTTTCC             | 473                               |
| <i>JAM3</i> Exon 8   | GTA CTGGCCCTGATCACGTT            | GAAATCTTCCCAGGAGACCC             | 315                               |
| <i>JAM3</i> Exon 9   | GCCCATGTTAGACTTACTCCG            | GACCAGTGGTGAACATGCTG             | 481                               |

**Table S4. Primers used for amplification and sequencing of *JAM3* cDNA to determine splicing of intron 5**

| <b>Forward primer (5'&gt;3')</b> | <b>Reverse primer (5'&gt;3')</b> | <b>Length of PCR product (bp)</b> |
|----------------------------------|----------------------------------|-----------------------------------|
| TTATCGCTGTGAGGTCGTTG             | CGCCAATGTT CAGGTCATAG            | 395                               |

The forward primer is located within exon 4, and the reverse primer spans across exon 6 and exon 7.
